# Supplementary material for: Electroacupuncture Induces Bilateral S1 and ACC Epigenetic Regulation of Genes in a Mouse Model of Neuropathic Pain
Source: MDPI journal article supplement (doi:10.3390/biomedicines11041030), 2023-03-27
Supplement: s1 [file s1]

**Table S1-S1(contralateral)\_TNI vs Sham**

| Gene_ID            | log FC   | log CPM  | P Value  | FD R     | fc       | Gene. name | Gene.description                                                                                             | Gene.type            |
|--------------------|----------|----------|----------|----------|----------|------------|--------------------------------------------------------------------------------------------------------------|----------------------|
| ENSMUSG00000066553 | 7.18153  | 3.650638 | 1.64E-50 | 3.84E-46 | 145.163  | Gm6969     | predicted pseudogene 6969 [Source:MGI Symbol;Acc:MGI:3645320]                                                | processed_pseudogene |
| ENSMUSG00000100801 | 3.96675  | 5.103609 | 5.36E-49 | 6.3E-45  | 15.63546 | Gm15459    | predicted gene 15459 [Source:MGI Symbol;Acc:MGI:3705702]                                                     | processed_pseudogene |
| ENSMUSG00000090733 | -1.91487 | 6.736712 | 9.12E-29 | 7.14E-25 | 0.265197 | Rps27      | ribosomal protein S27 [Source:MGI Symbol;Acc:MGI:1888676]                                                    | protein_coding       |
| ENSMUSG00000114003 | 3.810986 | 1.6732   | 5.95E-14 | 3.49E-10 | 14.03528 | Gm9616     | predicted gene 9616 [Source:MGI Symbol;Acc:MGI:3780024]                                                      | processed_pseudogene |
| ENSMUSG00000059058 | 3.812809 | 1.477952 | 1.39E-10 | 6.03E-07 | 14.05302 | Tma7-ps    | translational machinery associated 7 homolog (S. cerevisiae), pseudogene [Source:MGI Symbol;Acc:MGI:3705453] | processed_pseudogene |
| ENSMUSG00000074305 | -1.65896 | 6.758155 | 1.54E-10 | 6.03E-07 | 0.316666 | Peak1      | pseudopodium-enriched atypical kinase 1 [Source:MGI Symbol;Acc:MGI:2442366]                                  | protein_coding       |
| ENSMUSG00000050900 | 5.536452 | 0.6198   | 3.18E-10 | 1.07E-06 | 46.41283 | Gm7327     | predicted gene 7327 [Source:MGI Symbol;Acc:MGI:3646274]                                                      | processed_pseudogene |
| ENSMUSG00000063902 | 1.324139 | 4.155754 | 7.44E-09 | 2.18E-05 | 2.503835 | Gm7964     | predicted gene 7964 [Source:MGI Symbol;Acc:MGI:3646150]                                                      | processed_pseudogene |
| ENSMUSG00000092837 | -3.16506 | 1.554109 | 1.35E-07 | 0.00333  | 0.111486 | Rpph1      | ribonuclease P RNA component H1 [Source:MGI Symbol;Acc:MGI:1934664]                                          | ribozyme             |
| ENSMUSG00000047454 | -1.52517 | 9.94628  | 1.42E-07 | 0.00333  | 0.347439 | Gphn       | gephyrin [Source:MGI Symbol;Acc:MGI:109602]                                                                  | protein_coding       |
| ENSMUSG00000106106 | -1.49583 | 14.12328 | 2.3E-07  | 0.00492  | 0.354578 | CT010467.1 | 18s RNA, related sequence 5                                                                                  | rRNA                 |
| ENSMUSG00000038518 | -1.31014 | 8.388696 | 3.53E-07 | 0.0064   | 0.403283 | Jarid2     | jumonji, AT rich interactive domain 2 [Source:MGI Symbol;Acc:MGI:104813]                                     | protein_coding       |
| ENSMUSG00000030849 | -1.1877  | 7.411401 | 3.55E-07 | 0.0064   | 0.439001 | Fgfr2      | fibroblast growth factor receptor 2 [Source:MGI Symbol;Acc:MGI:95523]                                        | protein_coding       |

|                            |                      |                  |                  |                  |                  |                       |                                                                                                          |                    |
|----------------------------|----------------------|------------------|------------------|------------------|------------------|-----------------------|----------------------------------------------------------------------------------------------------------|--------------------|
| ENSMUS<br>G000000<br>37965 | -<br>1.4<br>382<br>2 | 12.<br>032<br>22 | 6.3<br>8E-<br>07 | 0.0<br>010<br>7  | 0.3<br>690<br>22 | Zc3h7<br>a            | zinc finger CCCH type containing 7 A<br>[Source:MGI Symbol;Acc:MGI:2445044]                              | protein_c<br>oding |
| ENSMUS<br>G000000<br>48758 | -<br>0.7<br>405<br>4 | 7.7<br>372<br>23 | 1.1<br>9E-<br>06 | 0.0<br>018<br>66 | 0.5<br>985<br>15 | Rpl29                 | ribosomal protein L29 [Source:MGI<br>Symbol;Acc:MGI:99687]                                               | protein_c<br>oding |
| ENSMUS<br>G000000<br>65037 | -<br>1.3<br>222<br>1 | 4.7<br>809<br>18 | 1.3<br>4E-<br>06 | 0.0<br>019<br>62 | 0.3<br>999<br>23 | Rn7sk                 | RNA, 7SK, nuclear [Source:MGI<br>Symbol;Acc:MGI:103186]                                                  | misc_RN<br>A       |
| ENSMUS<br>G000001<br>12941 | 1.6<br>612<br>86     | 2.6<br>384<br>57 | 1.6<br>E-<br>06  | 0.0<br>022<br>04 | 3.1<br>629<br>84 | Gm48<br>623           | predicted gene, 48623 [Source:MGI<br>Symbol;Acc:MGI:6098220]                                             | lncRNA             |
| ENSMUS<br>G000000<br>20836 | -<br>0.7<br>323<br>1 | 6.8<br>403<br>09 | 2.1<br>6E-<br>06 | 0.0<br>028<br>17 | 0.6<br>019<br>37 | Coro6                 | coronin 6 [Source:MGI<br>Symbol;Acc:MGI:2183448]                                                         | protein_c<br>oding |
| ENSMUS<br>G000000<br>86859 | -<br>0.9<br>429<br>6 | 4.5<br>466<br>03 | 5.1<br>8E-<br>06 | 0.0<br>062<br>71 | 0.5<br>201<br>64 | Snhg2<br>0            | small nucleolar RNA host gene 20<br>[Source:MGI Symbol;Acc:MGI:1924222]                                  | lncRNA             |
| ENSMUS<br>G000000<br>29843 | 2.3<br>214<br>86     | 2.0<br>868<br>64 | 5.3<br>4E-<br>06 | 0.0<br>062<br>71 | 4.9<br>984<br>67 | Slc13a<br>4           | solute carrier family 13 (sodium/sulfate<br>symporters), member 4 [Source:MGI<br>Symbol;Acc:MGI:2442367] | protein_c<br>oding |
| ENSMUS<br>G000000<br>75014 | -<br>3.8<br>164<br>8 | 0.1<br>611<br>54 | 7.6<br>8E-<br>06 | 0.0<br>085<br>89 | 0.0<br>709<br>78 | Gm10<br>800           | predicted gene 10800 [Source:MGI<br>Symbol;Acc:MGI:3641657]                                              | protein_c<br>oding |
| ENSMUS<br>G000000<br>50010 | -<br>2.6<br>430<br>5 | 0.6<br>924<br>87 | 1.5<br>E-<br>05  | 0.0<br>160<br>43 | 0.1<br>600<br>89 | Shisa3                | shisa family member 3 [Source:MGI<br>Symbol;Acc:MGI:3041225]                                             | protein_c<br>oding |
| ENSMUS<br>G000001<br>18642 | -<br>0.8<br>559<br>2 | 5.5<br>531<br>57 | 1.7<br>5E-<br>05 | 0.0<br>177<br>63 | 0.5<br>525<br>14 | NA                    | NA                                                                                                       | NA                 |
| ENSMUS<br>G000000<br>16427 | -<br>0.6<br>809<br>6 | 5.8<br>156<br>66 | 1.8<br>2E-<br>05 | 0.0<br>177<br>63 | 0.6<br>237<br>51 | Ndufa<br>1            | NADH:ubiquinone oxidoreductase subunit A1<br>[Source:MGI Symbol;Acc:MGI:1929511]                         | protein_c<br>oding |
| ENSMUS<br>G000000<br>22098 | -<br>0.6<br>713<br>7 | 6.4<br>587<br>24 | 2.5<br>1E-<br>05 | 0.0<br>235<br>38 | 0.6<br>279<br>09 | Bmp1                  | bone morphogenetic protein 1 [Source:MGI<br>Symbol;Acc:MGI:88176]                                        | protein_c<br>oding |
| ENSMUS<br>G000000<br>97098 | -<br>0.8<br>261<br>3 | 6.1<br>801<br>98 | 2.6<br>2E-<br>05 | 0.0<br>236<br>58 | 0.5<br>640<br>42 | 93301<br>11N0<br>5Rik | RIKEN cDNA 9330111N05 gene [Source:MGI<br>Symbol;Acc:MGI:2443112]                                        | lncRNA             |

|                            |                      |                  |                  |                  |                  |            |                                                                                                            |                              |
|----------------------------|----------------------|------------------|------------------|------------------|------------------|------------|------------------------------------------------------------------------------------------------------------|------------------------------|
| ENSMUS<br>G000000<br>28998 | -<br>0.7<br>364<br>9 | 5.4<br>399<br>88 | 3.1<br>3E-<br>05 | 0.0<br>272<br>17 | 0.6<br>001<br>97 | Tomm<br>7  | translocase of outer mitochondrial membrane<br>7 [Source:MGI Symbol;Acc:MGI:1913419]                       | protein_c<br>oding           |
| ENSMUS<br>G000000<br>37243 | -<br>0.7<br>303<br>2 | 5.3<br>606<br>72 | 4.9<br>4E-<br>05 | 0.0<br>401<br>53 | 0.6<br>027<br>68 | Zfp69<br>2 | zinc finger protein 692 [Source:MGI<br>Symbol;Acc:MGI:2144276]                                             | protein_c<br>oding           |
| ENSMUS<br>G000000<br>26837 | -<br>0.7<br>500<br>6 | 5.0<br>992<br>2  | 4.9<br>9E-<br>05 | 0.0<br>401<br>53 | 0.5<br>945<br>8  | Col5a<br>1 | collagen, type V, alpha 1 [Source:MGI<br>Symbol;Acc:MGI:88457]                                             | protein_c<br>oding           |
| ENSMUS<br>G000000<br>97767 | -<br>0.7<br>961<br>4 | 7.1<br>912<br>9  | 5.1<br>3E-<br>05 | 0.0<br>401<br>53 | 0.5<br>758<br>89 | Miat       | myocardial infarction associated transcript<br>(non-protein coding) [Source:MGI<br>Symbol;Acc:MGI:2444886] | lncRNA                       |
| ENSMUS<br>G000000<br>26185 | 0.6<br>465<br>64     | 6.5<br>173<br>28 | 5.3<br>E-<br>05  | 0.0<br>401<br>62 | 1.5<br>654<br>36 | Igfbp5     | insulin-like growth factor binding protein 5<br>[Source:MGI Symbol;Acc:MGI:96440]                          | protein_c<br>oding           |
| ENSMUS<br>G000000<br>45104 | -<br>4.0<br>188<br>5 | 2.7<br>274<br>54 | 5.8<br>7E-<br>05 | 0.0<br>430<br>84 | 0.0<br>616<br>89 | Gm55<br>14 | predicted gene 5514 [Source:MGI<br>Symbol;Acc:MGI:3645435]                                                 | processe<br>d_pseud<br>ogene |

**Table S2-S1(contralateral)\_TNI-EA vs TNI**

| Gene_ID           | logF<br>C        | logC<br>PM       | PValue           | FDR              | fc               | Gene.name     | Gene.description                                                           | Gene.type            |
|-------------------|------------------|------------------|------------------|------------------|------------------|---------------|----------------------------------------------------------------------------|----------------------|
| ENSMUSG0000065037 | -<br>1.79<br>303 | 3.35<br>719<br>8 | 7.57<br>E-<br>09 | 0.00<br>017<br>6 | 0.28<br>856<br>5 | Rn7sk         | RNA, 7SK, nuclear [Source:MGI Symbol;Acc:MGI:103186]                       | misc_RNA             |
| ENSMUSG0000101523 | -<br>3.57<br>408 | 1.06<br>354<br>4 | 1.71<br>E-<br>08 | 0.00<br>019<br>9 | 0.08<br>396<br>4 | Csnk2a3       | casein kinase 2 alpha 3 [Source:MGI Symbol;Acc:MGI:3704198]                | processed_pseudogene |
| ENSMUSG0000021702 | 1.91<br>903<br>9 | 3.02<br>864<br>2 | 1.25<br>E-<br>07 | 0.00<br>096<br>7 | 3.78<br>171<br>1 | Thbs4         | thrombospondin 4 [Source:MGI Symbol;Acc:MGI:1101779]                       | protein_coding       |
| ENSMUSG0000097098 | 0.91<br>678<br>2 | 6.25<br>647<br>3 | 5.37<br>E-<br>07 | 0.00<br>311<br>7 | 1.88<br>789<br>9 | 9330111N05Rik | RIKEN cDNA 9330111N05 gene [Source:MGI Symbol;Acc:MGI:2443112]             | lncRNA               |
| ENSMUSG0000036777 | 1.13<br>550<br>3 | 5.16<br>477<br>5 | 6.73<br>E-<br>06 | 0.02<br>806<br>4 | 2.19<br>695<br>2 | Anln          | anillin, actin binding protein [Source:MGI Symbol;Acc:MGI:1920174]         | protein_coding       |
| ENSMUSG0000061808 | 6.44<br>113<br>6 | 5.71<br>424<br>5 | 7.25<br>E-<br>06 | 0.02<br>806<br>4 | 86.8<br>910<br>5 | Ttr           | transthyretin [Source:MGI Symbol;Acc:MGI:98865]                            | protein_coding       |
| ENSMUSG0000036098 | 0.97<br>240<br>7 | 5.33<br>444<br>3 | 1.13<br>E-<br>05 | 0.03<br>734<br>8 | 1.96<br>211<br>1 | Myrf          | myelin regulatory factor [Source:MGI Symbol;Acc:MGI:2684944]               | protein_coding       |
| ENSMUSG0000040860 | 0.92<br>222<br>5 | 5.55<br>415<br>2 | 1.53<br>E-<br>05 | 0.04<br>431<br>5 | 1.89<br>503<br>5 | Crocc         | ciliary rootlet coiled-coil, rootletin [Source:MGI Symbol;Acc:MGI:3529431] | protein_coding       |

**Table S3-S1(ipsilateral)\_TNI vs Sham**

| Gene_ID            | log FC   | log CPM  | PV alue  | FD R     | fc       | Gene. name    | Gene.description                                                                            | Gene.type            |
|--------------------|----------|----------|----------|----------|----------|---------------|---------------------------------------------------------------------------------------------|----------------------|
| ENSMUSG00000066553 | 7.2807   | 3.259417 | 1.28E-34 | 3.09E-30 | 155.7197 | Gm6969        | predicted pseudogene 6969 [Source:MGI Symbol;Acc:MGI:3645320]                               | processed_pseudogene |
| ENSMUSG00000100801 | 4.021609 | 5.06343  | 1.2E-30  | 1.46E-26 | 16.24145 | Gm15459       | predicted gene 15459 [Source:MGI Symbol;Acc:MGI:3705702]                                    | processed_pseudogene |
| ENSMUSG00000030255 | 2.21335  | 6.616879 | 6.45E-23 | 5.2E-19  | 4.637507 | Sspn          | sarcospan [Source:MGI Symbol;Acc:MGI:1353511]                                               | protein_coding       |
| ENSMUSG00000049233 | -6.49478 | 1.817014 | 4.97E-20 | 2.71E-16 | 0.011089 | Apoo-ps       | apolipoprotein O, pseudogene [Source:MGI Symbol;Acc:MGI:3649039]                            | processed_pseudogene |
| ENSMUSG00000036019 | 2.195944 | 9.212082 | 5.6E-20  | 2.71E-16 | 4.581893 | Tmtc2         | transmembrane and tetratricopeptide repeat containing 2 [Source:MGI Symbol;Acc:MGI:1914057] | protein_coding       |
| ENSMUSG00000029635 | 1.906767 | 11.40228 | 4.85E-19 | 1.96E-15 | 3.749678 | Cdk8          | cyclin-dependent kinase 8 [Source:MGI Symbol;Acc:MGI:1196224]                               | protein_coding       |
| ENSMUSG00000115432 | 2.189569 | 9.133827 | 4.01E-14 | 1.23E-10 | 4.561692 | D130009118Rik | RIKEN cDNA D130009I18 gene [Source:MGI Symbol;Acc:MGI:2443663]                              | lncRNA               |
| ENSMUSG00000038518 | 2.190855 | 9.086665 | 4.08E-14 | 1.23E-10 | 4.56576  | Jarid2        | jumonji, AT rich interactive domain 2 [Source:MGI Symbol;Acc:MGI:104813]                    | protein_coding       |
| ENSMUSG00000035202 | 2.53615  | 11.65583 | 2.4E-13  | 6.44E-10 | 5.800389 | Lars2         | leucyl-tRNA synthetase, mitochondrial [Source:MGI Symbol;Acc:MGI:2142973]                   | protein_coding       |
| ENSMUSG00000082820 | 5.121138 | 0.782273 | 3.96E-13 | 9.57E-10 | 34.80295 | Gm13803       | predicted gene 13803 [Source:MGI Symbol;Acc:MGI:3651056]                                    | processed_pseudogene |
| ENSMUSG00000098973 | 2.574984 | 5.380126 | 2.51E-12 | 5.53E-09 | 5.958645 | Mir6236       | microRNA 6236 [Source:MGI Symbol;Acc:MGI:5530929]                                           | miRNA                |

|                            |                      |                      |                  |                      |                      |                    |                                                                                                                    |                          |
|----------------------------|----------------------|----------------------|------------------|----------------------|----------------------|--------------------|--------------------------------------------------------------------------------------------------------------------|--------------------------|
| ENSMUS<br>G000000<br>59058 | 3.8<br>19<br>70<br>2 | 1.9<br>02<br>21<br>2 | 2.0<br>7E-<br>11 | 4.1<br>7E-<br>08     | 14.<br>12<br>03<br>4 | Tma7<br>-ps        | translational machinery associated 7<br>homolog (S. cerevisiae), pseudogene<br>[Source:MGI Symbol;Acc:MGI:3705453] | processed_ps<br>eudogene |
| ENSMUS<br>G000000<br>47454 | 2.3<br>31<br>90<br>4 | 10.<br>71<br>42<br>2 | 2.6<br>1E-<br>11 | 4.8<br>7E-<br>08     | 5.0<br>34<br>69<br>2 | Gphn               | gephyrin [Source:MGI<br>Symbol;Acc:MGI:109602]                                                                     | protein_codi<br>ng       |
| ENSMUS<br>G000000<br>39145 | 1.9<br>28<br>83<br>5 | 9.5<br>29<br>02<br>6 | 3.3<br>5E-<br>11 | 5.7<br>9E-<br>08     | 3.8<br>07<br>47<br>7 | Camk<br>1d         | calcium/calmodulin-dependent protein<br>kinase ID [Source:MGI<br>Symbol;Acc:MGI:2442190]                           | protein_codi<br>ng       |
| ENSMUS<br>G000001<br>06106 | 2.5<br>34<br>67<br>3 | 15.<br>00<br>02<br>8 | 1.4<br>8E-<br>10 | 2.3<br>9E-<br>07     | 5.7<br>94<br>45<br>3 | CT01<br>0467.<br>1 | 18s RNA, related sequence 5                                                                                        | rRNA                     |
| ENSMUS<br>G000000<br>37965 | 2.5<br>05<br>40<br>4 | 12.<br>80<br>83<br>6 | 1.1<br>1E-<br>09 | 1.6<br>8E-<br>06     | 5.6<br>78<br>08<br>4 | Zc3h7<br>a         | zinc finger CCCH type containing 7 A<br>[Source:MGI Symbol;Acc:MGI:2445044]                                        | protein_codi<br>ng       |
| ENSMUS<br>G000000<br>79264 | 2.0<br>19<br>23<br>4 | 3.6<br>25<br>26<br>7 | 8.7<br>9E-<br>09 | 1.2<br>5E-<br>05     | 4.0<br>53<br>68<br>6 | Gm11<br>077        | predicted gene 11077 [Source:MGI<br>Symbol;Acc:MGI:3779304]                                                        | protein_codi<br>ng       |
| ENSMUS<br>G000000<br>50377 | 2.5<br>85<br>10<br>7 | 2.8<br>75<br>27<br>5 | 1.0<br>3E-<br>08 | 1.3<br>8E-<br>05     | 6.0<br>00<br>60<br>2 | Il31ra             | interleukin 31 receptor A [Source:MGI<br>Symbol;Acc:MGI:2180511]                                                   | protein_codi<br>ng       |
| ENSMUS<br>G000000<br>30849 | 1.5<br>69<br>67<br>8 | 7.9<br>82<br>66<br>4 | 1.0<br>7E-<br>07 | 0.0<br>00<br>13<br>6 | 2.9<br>68<br>38<br>4 | Fgfr2              | fibroblast growth factor receptor 2<br>[Source:MGI Symbol;Acc:MGI:95523]                                           | protein_codi<br>ng       |
| ENSMUS<br>G000001<br>13136 | 2.4<br>62<br>56<br>2 | 6.9<br>60<br>47<br>2 | 1.4<br>8E-<br>07 | 0.0<br>00<br>17<br>9 | 5.5<br>11<br>94<br>7 | Gm19<br>951        | predicted gene, 19951 [Source:MGI<br>Symbol;Acc:MGI:5012136]                                                       | lncRNA                   |
| ENSMUS<br>G000000<br>83833 | 5.1<br>45<br>52<br>2 | 0.3<br>21<br>43<br>5 | 1.6<br>4E-<br>07 | 0.0<br>00<br>18<br>8 | 35.<br>39<br>61<br>9 | Gm13<br>841        | predicted gene 13841 [Source:MGI<br>Symbol;Acc:MGI:3650890]                                                        | processed_ps<br>eudogene |
| ENSMUS<br>G000000<br>92837 | 3.3<br>03<br>39<br>2 | 3.1<br>66<br>09<br>9 | 1.8<br>1E-<br>07 | 0.0<br>00<br>19<br>9 | 9.8<br>72<br>33<br>9 | Rpph<br>1          | ribonuclease P RNA component H1<br>[Source:MGI Symbol;Acc:MGI:1934664]                                             | ribozyme                 |
| ENSMUS<br>G000000<br>63684 | 2.1<br>79<br>35<br>6 | 2.2<br>46<br>64      | 2.5<br>4E-<br>07 | 0.0<br>00<br>26<br>7 | 4.5<br>29<br>51<br>3 | Gm13<br>910        | predicted gene 13910 [Source:MGI<br>Symbol;Acc:MGI:3651143]                                                        | processed_ps<br>eudogene |
| ENSMUS<br>G000000<br>88609 | 2.5<br>30<br>99<br>1 | 3.2<br>99<br>74<br>4 | 8.3<br>5E-<br>07 | 0.0<br>00<br>84<br>2 | 5.7<br>79<br>68<br>7 | Gm24<br>187        | predicted gene, 24187 [Source:MGI<br>Symbol;Acc:MGI:5453964]                                                       | miRNA                    |

|                            |                      |                      |                  |                      |                      |                       |                                                                                           |                                          |
|----------------------------|----------------------|----------------------|------------------|----------------------|----------------------|-----------------------|-------------------------------------------------------------------------------------------|------------------------------------------|
| ENSMUS<br>G000001<br>10924 | 2.2<br>23<br>94<br>7 | 2.3<br>53<br>24<br>9 | 1.6<br>4E-<br>06 | 0.0<br>01<br>56      | 4.6<br>71<br>69<br>7 | Gm40<br>518           | predicted gene, 40518 [Source:MGI<br>Symbol;Acc:MGI:5623403]                              | lncRNA                                   |
| ENSMUS<br>G000000<br>02324 | -<br>4.7<br>08<br>44 | 0.1<br>79<br>19<br>5 | 1.6<br>8E-<br>06 | 0.0<br>01<br>56      | 0.0<br>38<br>24<br>9 | Rec8                  | REC8 meiotic recombination protein<br>[Source:MGI Symbol;Acc:MGI:1929645]                 | protein_codi<br>ng                       |
| ENSMUS<br>G000000<br>65037 | 2.8<br>40<br>07<br>9 | 5.7<br>34<br>74<br>8 | 1.9<br>5E-<br>06 | 0.0<br>01<br>74<br>9 | 7.1<br>60<br>59<br>3 | Rn7sk                 | RNA, 7SK, nuclear [Source:MGI<br>Symbol;Acc:MGI:103186]                                   | misc_RNA                                 |
| ENSMUS<br>G000000<br>78495 | 3.4<br>09<br>59<br>3 | -<br>0.0<br>78<br>89 | 6.1<br>4E-<br>06 | 0.0<br>05<br>30<br>7 | 10.<br>62<br>64<br>9 | Zfp98<br>4            | zinc finger protein 984 [Source:MGI<br>Symbol;Acc:MGI:3651978]                            | protein_codi<br>ng                       |
| ENSMUS<br>G000000<br>84890 | -<br>4.4<br>75<br>77 | 3.8<br>61<br>36<br>2 | 6.9<br>8E-<br>06 | 0.0<br>05<br>82<br>8 | 0.0<br>44<br>94<br>3 | A830<br>036E<br>02Rik | RIKEN cDNA A830036E02 gene [Source:MGI<br>Symbol;Acc:MGI:3686876]                         | lncRNA                                   |
| ENSMUS<br>G000000<br>95298 | -<br>7.0<br>35<br>27 | 4.2<br>02<br>38<br>3 | 9.9<br>1E-<br>06 | 0.0<br>07<br>99      | 0.0<br>07<br>62<br>4 | Gm12<br>407           | predicted gene 12407 [Source:MGI<br>Symbol;Acc:MGI:3693096]                               | unprocessed_<br>pseudogene               |
| ENSMUS<br>G000000<br>74305 | 2.0<br>26<br>45<br>4 | 7.4<br>31<br>83<br>2 | 1.6<br>E-<br>05  | 0.0<br>12<br>50<br>5 | 4.0<br>74<br>02<br>2 | Peak<br>1             | pseudopodium-enriched atypical kinase 1<br>[Source:MGI Symbol;Acc:MGI:2442366]            | protein_codi<br>ng                       |
| ENSMUS<br>G000001<br>11633 | 2.9<br>57<br>39<br>7 | -<br>0.0<br>08<br>29 | 2.7<br>6E-<br>05 | 0.0<br>20<br>83<br>7 | 7.7<br>67<br>21<br>3 | Gm39<br>377           | predicted gene, 39377 [Source:MGI<br>Symbol;Acc:MGI:5622262]                              | lncRNA                                   |
| ENSMUS<br>G000000<br>22126 | 5.6<br>12<br>70<br>7 | 0.7<br>28<br>30<br>2 | 3.9<br>2E-<br>05 | 0.0<br>28<br>77<br>4 | 48.<br>93<br>20<br>3 | Acod<br>1             | aconitate decarboxylase 1 [Source:MGI<br>Symbol;Acc:MGI:103206]                           | protein_codi<br>ng                       |
| ENSMUS<br>G000000<br>72476 | 4.0<br>87<br>16<br>8 | -<br>0.5<br>83<br>52 | 4.3<br>5E-<br>05 | 0.0<br>30<br>99<br>1 | 16.<br>99<br>65<br>2 | Gm90<br>08            | predicted pseudogene 9008 [Source:MGI<br>Symbol;Acc:MGI:3644000]                          | protein_codi<br>ng                       |
| ENSMUS<br>G000001<br>00153 | -<br>3.7<br>05<br>72 | 3.7<br>51<br>85      | 5.9<br>6E-<br>05 | 0.0<br>41<br>18<br>6 | 0.0<br>76<br>64<br>2 | Ppp1<br>ccb           | protein phosphatase 1 catalytic subunit<br>gamma B [Source:MGI<br>Symbol;Acc:MGI:3647492] | transcribed_p<br>rocessed_pse<br>udogene |

**Table S4-S1(ipsilateral)\_TNI-EA vs TNI**

| Gene_ID            | log FC   | log CP M | PV alue  | FDR      | fc       | Gene. name | Gene.description                                                                            | Gene.type      |
|--------------------|----------|----------|----------|----------|----------|------------|---------------------------------------------------------------------------------------------|----------------|
| ENSMUSG00000065037 | -3.75932 | 5.616411 | 6.04E-69 | 1.45E-64 | 0.073847 | Rn7sk      | RNA, 7SK, nuclear [Source:MGI Symbol;Acc:MGI:103186]                                        | misc_RNA       |
| ENSMUSG00000030255 | -2.52902 | 6.533929 | 4.62E-34 | 5.53E-30 | 0.173256 | Sspn       | sarcospan [Source:MGI Symbol;Acc:MGI:1353511]                                               | protein_coding |
| ENSMUSG00000038518 | -2.82287 | 8.9588   | 9.78E-30 | 7.82E-26 | 0.141329 | Jarid2     | jumonji, AT rich interactive domain 2 [Source:MGI Symbol;Acc:MGI:104813]                    | protein_coding |
| ENSMUSG00000092837 | -3.81866 | 3.078153 | 1.27E-27 | 7.61E-24 | 0.070871 | Rpph1      | ribonuclease P RNA component H1 [Source:MGI Symbol;Acc:MGI:1934664]                         | ribozyme       |
| ENSMUSG00000029635 | -2.24873 | 11.30593 | 8.19E-26 | 3.93E-22 | 0.210409 | Cdk8       | cyclin-dependent kinase 8 [Source:MGI Symbol;Acc:MGI:1196224]                               | protein_coding |
| ENSMUSG00000035202 | -3.09349 | 11.55323 | 1.56E-25 | 6.24E-22 | 0.117156 | Lars2      | leucyl-tRNA synthetase, mitochondrial [Source:MGI Symbol;Acc:MGI:2142973]                   | protein_coding |
| ENSMUSG00000036019 | -2.66533 | 9.106721 | 5.25E-25 | 1.8E-21  | 0.157636 | Tmtc2      | transmembrane and tetratricopeptide repeat containing 2 [Source:MGI Symbol;Acc:MGI:1914057] | protein_coding |
| ENSMUSG00000039145 | -2.25035 | 9.435559 | 6.36E-23 | 1.91E-19 | 0.210174 | Camk1d     | calcium/calmodulin-dependent protein kinase ID [Source:MGI Symbol;Acc:MGI:2442190]          | protein_coding |
| ENSMUSG00000106106 | -3.19569 | 14.88674 | 6.23E-21 | 1.66E-17 | 0.109145 | CT010467.1 | 18s RNA, related sequence 5                                                                 | rRNA           |
| ENSMUSG00000047454 | -2.8064  | 10.61214 | 4.19E-20 | 1E-16    | 0.142952 | Gphn       | gephyrin [Source:MGI Symbol;Acc:MGI:109602]                                                 | protein_coding |
| ENSMUSG00000113136 | -3.02994 | 6.851186 | 1.18E-19 | 2.57E-16 | 0.122433 | Gm19951    | predicted gene, 19951 [Source:MGI Symbol;Acc:MGI:5012136]                                   | lncRNA         |
| ENSMUSG00000098973 | -3.53358 | 5.237995 | 6.09E-19 | 1.22E-15 | 0.086355 | Mir6236    | microRNA 6236 [Source:MGI Symbol;Acc:MGI:5530929]                                           | miRNA          |



|                    |                      |                      |                  |                  |                  |               |                                                                             |                      |
|--------------------|----------------------|----------------------|------------------|------------------|------------------|---------------|-----------------------------------------------------------------------------|----------------------|
| ENSMUSG00000037965 | -<br>3.1<br>186<br>2 | 12.<br>697<br>31     | 8.6<br>4E-<br>19 | 1.5<br>9E-<br>15 | 0.1<br>151<br>34 | Zc3h7a        | zinc finger CCCH type containing 7 A [Source:MGI Symbol;Acc:MGI:2445044]    | protein_coding       |
| ENSMUSG00000115432 | -<br>2.5<br>692<br>5 | 9.0<br>394<br>65     | 4.1<br>5E-<br>18 | 7.1<br>E-<br>15  | 0.1<br>684<br>92 | D130009I18Rik | RIKEN cDNA D130009I18 gene [Source:MGI Symbol;Acc:MGI:2443663]              | lncRNA               |
| ENSMUSG00000050377 | -<br>4.1<br>023<br>9 | 2.6<br>791<br>88     | 2.0<br>9E-<br>15 | 3.3<br>3E-<br>12 | 0.0<br>582<br>18 | Il31ra        | interleukin 31 receptor A [Source:MGI Symbol;Acc:MGI:2180511]               | protein_coding       |
| ENSMUSG00000088609 | -<br>3.2<br>874<br>5 | 3.1<br>621<br>67     | 4.3<br>7E-<br>15 | 6.5<br>4E-<br>12 | 0.1<br>024<br>19 | Gm24187       | predicted gene, 24187 [Source:MGI Symbol;Acc:MGI:5453964]                   | miRNA                |
| ENSMUSG00000064317 | 3.4<br>598<br>65     | 1.5<br>719<br>3      | 4.0<br>9E-<br>13 | 5.7<br>7E-<br>10 | 11.<br>003<br>3  | Gm10146       | predicted gene 10146 [Source:MGI Symbol;Acc:MGI:3704367]                    | processed_pseudogene |
| ENSMUSG00000030849 | -<br>1.8<br>058<br>3 | 7.8<br>930<br>14     | 1.5<br>1E-<br>11 | 2.0<br>2E-<br>08 | 0.2<br>860<br>16 | Fgfr2         | fibroblast growth factor receptor 2 [Source:MGI Symbol;Acc:MGI:95523]       | protein_coding       |
| ENSMUSG00000074305 | -<br>2.4<br>657<br>6 | 7.3<br>187<br>96     | 4.1<br>2E-<br>10 | 5.2<br>E-<br>07  | 0.1<br>810<br>22 | Peak1         | pseudopodium-enriched atypical kinase 1 [Source:MGI Symbol;Acc:MGI:2442366] | protein_coding       |
| ENSMUSG00000039617 | 4.1<br>905<br>42     | 0.2<br>214<br>25     | 2.4<br>9E-<br>08 | 2.9<br>9E-<br>05 | 18.<br>259<br>08 | Gm7488        | predicted gene 7488 [Source:MGI Symbol;Acc:MGI:3647006]                     | processed_pseudogene |
| ENSMUSG00000051627 | -<br>4.3<br>387<br>9 | -<br>0.5<br>864<br>7 | 7.5<br>1E-<br>07 | 0.0<br>008<br>57 | 0.0<br>494<br>19 | Hist1h1e      | histone cluster 1, H1e [Source:MGI Symbol;Acc:MGI:1931527]                  | protein_coding       |
| ENSMUSG00000010122 | -<br>2.6<br>200<br>2 | 0.4<br>121<br>76     | 3.9<br>9E-<br>06 | 0.0<br>043<br>46 | 0.1<br>626<br>65 | Slc47a1       | solute carrier family 47, member 1 [Source:MGI Symbol;Acc:MGI:1914723]      | protein_coding       |
| ENSMUSG00000053830 | -<br>4.0<br>385<br>1 | -<br>0.8<br>287<br>5 | 8.0<br>3E-<br>06 | 0.0<br>083<br>69 | 0.0<br>608<br>54 | Gm9923        | predicted pseudogene 9923 [Source:MGI Symbol;Acc:MGI:3704365]               | processed_pseudogene |
| ENSMUSG00000022126 | -<br>5.7<br>597<br>8 | 0.6<br>483           | 2.3<br>1E-<br>05 | 0.0<br>230<br>48 | 0.0<br>184<br>56 | Acod1         | aconitate decarboxylase 1 [Source:MGI Symbol;Acc:MGI:103206]                | protein_coding       |

**Table S5-ACC(contralateral)\_TNI vs Sham**

| Gene_ID             | log FC   | log CPM  | PV alue  | FD R     | fc       | Gene.name | Gene.description                                                                                                    | Gene.type              |
|---------------------|----------|----------|----------|----------|----------|-----------|---------------------------------------------------------------------------------------------------------------------|------------------------|
| ENSMUSG00000069045  | 9.299755 | 4.22566  | 6.27E-61 | 1.49E-56 | 630.2389 | Ddx3y     | DEAD (Asp-Glu-Ala-Asp) box polypeptide 3, Y-linked [Source:MGI Symbol;Acc:MGI:1349406]                              | protein_coding         |
| ENSMUSG00000069049  | 8.853749 | 3.776869 | 2.96E-54 | 3.53E-50 | 462.6407 | Eif2s3y   | eukaryotic translation initiation factor 2, subunit 3, structural gene Y-linked [Source:MGI Symbol;Acc:MGI:1349430] | protein_coding         |
| ENSMUSG00000056673  | 7.478974 | 2.380032 | 1.08E-25 | 8.54E-22 | 178.4003 | Kdm5d     | lysine (K)-specific demethylase 5D [Source:MGI Symbol;Acc:MGI:99780]                                                | protein_coding         |
| ENSMUSG00000068457  | 7.132586 | 2.028467 | 9.23E-22 | 5.5E-18  | 140.3209 | Uty       | ubiquitously transcribed tetratricopeptide repeat gene, Y chromosome [Source:MGI Symbol;Acc:MGI:894810]             | protein_coding         |
| ENSMUSG00000049723  | 6.47399  | 1.335402 | 3.33E-12 | 1.59E-08 | 88.8925  | Mmp12     | matrix metalloproteinase 12 [Source:MGI Symbol;Acc:MGI:97005]                                                       | protein_coding         |
| ENSMUSG00000029816  | 3.578076 | 3.40007  | 3.26E-10 | 1.29E-06 | 11.94286 | Gpnm6     | glycoprotein (transmembrane) nmb [Source:MGI Symbol;Acc:MGI:1934765]                                                | protein_coding         |
| ENSMUSG00000068299  | 2.900873 | 2.135084 | 1.59E-09 | 5.38E-06 | 7.468781 | Nat8f4    | N-acetyltransferase 8 (GCN5-related) family member 4 [Source:MGI Symbol;Acc:MGI:1922791]                            | protein_coding         |
| ENSMUSG000000100131 | 2.223641 | 2.227628 | 1.81E-09 | 5.38E-06 | 4.670706 | Gm28439   | predicted gene 28439 [Source:MGI Symbol;Acc:MGI:5579145]                                                            | unprocessed_pseudogene |
| ENSMUSG000000101249 | 1.848765 | 2.813696 | 1.08E-08 | 2.86E-05 | 3.601916 | Gm29216   | predicted gene 29216 [Source:MGI Symbol;Acc:MGI:5579922]                                                            | unprocessed_pseudogene |
| ENSMUSG00000064367  | 1.3532   | 12.63087 | 1.58E-08 | 3.76E-05 | 2.55369  | mt-Nd5    | mitochondrially encoded NADH dehydrogenase 5 [Source:MGI Symbol;Acc:MGI:102496]                                     | protein_coding         |
| ENSMUSG000000100862 | 1.462041 | 3.97676  | 8.28E-08 | 0.00179  | 2.754979 | Gm10925   | predicted gene 10925 [Source:MGI Symbol;Acc:MGI:3809095]                                                            | unprocessed_pseudogene |

|                            |                      |                      |                  |                      |                      |                 |                                                                                           |                            |
|----------------------------|----------------------|----------------------|------------------|----------------------|----------------------|-----------------|-------------------------------------------------------------------------------------------|----------------------------|
| ENSMUS<br>G000000<br>32572 | -<br>2.3<br>69<br>68 | 1.6<br>27<br>02<br>1 | 2.5<br>4E-<br>07 | 0.0<br>00<br>50<br>5 | 0.1<br>93<br>48<br>9 | Col6<br>a4      | collagen, type VI, alpha 4 [Source:MGI<br>Symbol;Acc:MGI:1915803]                         | protein_codin<br>g         |
| ENSMUS<br>G000000<br>64354 | 1.8<br>38<br>75<br>4 | 2.9<br>23<br>59<br>7 | 3.2<br>3E-<br>07 | 0.0<br>00<br>59<br>2 | 3.5<br>77<br>01<br>1 | mt-<br>Co2      | mitochondrially encoded cytochrome c<br>oxidase II [Source:MGI<br>Symbol;Acc:MGI:102503]  | protein_codin<br>g         |
| ENSMUS<br>G000000<br>64339 | 1.3<br>83<br>22<br>8 | 13.<br>73<br>83<br>4 | 1.3<br>8E-<br>06 | 0.0<br>02<br>35      | 2.6<br>08<br>51<br>5 | mt-<br>Rnr<br>2 | mitochondrially encoded 16S rRNA<br>[Source:MGI Symbol;Acc:MGI:102492]                    | Mt_rRNA                    |
| ENSMUS<br>G000000<br>64345 | 1.1<br>53<br>33<br>5 | 12.<br>62<br>21<br>8 | 2.2<br>6E-<br>06 | 0.0<br>03<br>28      | 2.2<br>24<br>27<br>5 | mt-<br>Nd2      | mitochondrially encoded NADH<br>dehydrogenase 2 [Source:MGI<br>Symbol;Acc:MGI:102500]     | protein_codin<br>g         |
| ENSMUS<br>G000000<br>64368 | 1.1<br>17<br>52<br>6 | 10.<br>38<br>33<br>2 | 2.3<br>2E-<br>06 | 0.0<br>03<br>28      | 2.1<br>69<br>74<br>5 | mt-<br>Nd6      | mitochondrially encoded NADH<br>dehydrogenase 6 [Source:MGI<br>Symbol;Acc:MGI:102495]     | protein_codin<br>g         |
| ENSMUS<br>G000001<br>00863 | 5.8<br>57<br>46<br>2 | 3.1<br>30<br>75<br>4 | 2.3<br>4E-<br>06 | 0.0<br>03<br>28      | 57.<br>97<br>91<br>5 | Gm<br>126<br>69 | predicted gene 12669 [Source:MGI<br>Symbol;Acc:MGI:3651683]                               | processed_ps<br>eudogene   |
| ENSMUS<br>G000000<br>01119 | -<br>1.0<br>64<br>91 | 5.8<br>22<br>37<br>8 | 2.4<br>9E-<br>06 | 0.0<br>03<br>29<br>8 | 0.4<br>78<br>00<br>2 | Col6<br>a1      | collagen, type VI, alpha 1 [Source:MGI<br>Symbol;Acc:MGI:88459]                           | protein_codin<br>g         |
| ENSMUS<br>G000000<br>64337 | 1.3<br>59<br>79<br>5 | 13.<br>35<br>13<br>6 | 4E-<br>06        | 0.0<br>05<br>02<br>1 | 2.5<br>66<br>48<br>7 | mt-<br>Rnr<br>1 | mitochondrially encoded 12S rRNA<br>[Source:MGI Symbol;Acc:MGI:102493]                    | Mt_rRNA                    |
| ENSMUS<br>G000000<br>02944 | 3.2<br>82<br>87<br>2 | 0.9<br>26<br>11<br>1 | 4.5<br>5E-<br>06 | 0.0<br>05<br>05<br>8 | 9.7<br>32<br>91<br>6 | Cd3<br>6        | CD36 molecule [Source:MGI<br>Symbol;Acc:MGI:107899]                                       | protein_codin<br>g         |
| ENSMUS<br>G000000<br>64358 | 1.4<br>74<br>46<br>4 | 2.8<br>39<br>40<br>2 | 4.6<br>4E-<br>06 | 0.0<br>05<br>05<br>8 | 2.7<br>78<br>80<br>3 | mt-<br>Co3      | mitochondrially encoded cytochrome c<br>oxidase III [Source:MGI<br>Symbol;Acc:MGI:102502] | protein_codin<br>g         |
| ENSMUS<br>G000000<br>64357 | 1.4<br>76<br>58<br>5 | 2.9<br>12<br>67<br>5 | 4.6<br>7E-<br>06 | 0.0<br>05<br>05<br>8 | 2.7<br>82<br>89<br>3 | mt-<br>Atp<br>6 | mitochondrially encoded ATP synthase 6<br>[Source:MGI Symbol;Acc:MGI:99927]               | protein_codin<br>g         |
| ENSMUS<br>G000001<br>01111 | 1.5<br>11<br>84<br>6 | 3.0<br>11<br>14<br>8 | 5.0<br>8E-<br>06 | 0.0<br>05<br>26      | 2.8<br>51<br>74<br>6 | Gm<br>284<br>37 | predicted gene 28437 [Source:MGI<br>Symbol;Acc:MGI:5579143]                               | unprocessed_<br>pseudogene |
| ENSMUS<br>G000001<br>10924 | 1.2<br>94<br>09<br>6 | 3.5<br>43<br>69      | 9.0<br>3E-<br>06 | 0.0<br>08<br>97<br>2 | 2.4<br>52<br>23<br>3 | Gm<br>405<br>18 | predicted gene, 40518 [Source:MGI<br>Symbol;Acc:MGI:5623403]                              | lncRNA                     |

|                            |                      |                      |                  |                      |                      |                 |                                                                                           |                                          |
|----------------------------|----------------------|----------------------|------------------|----------------------|----------------------|-----------------|-------------------------------------------------------------------------------------------|------------------------------------------|
| ENSMUS<br>G000000<br>64341 | 1.1<br>04<br>51<br>4 | 13.<br>52<br>00<br>6 | 1E-<br>05        | 0.0<br>09<br>55<br>7 | 2.1<br>50<br>26<br>4 | mt-<br>Nd1      | mitochondrially encoded NADH<br>dehydrogenase 1 [Source:MGI<br>Symbol;Acc:MGI:101787]     | protein_codin<br>g                       |
| ENSMUS<br>G000000<br>63953 | -<br>1.9<br>71<br>2  | 1.9<br>72<br>34<br>2 | 1.6<br>8E-<br>05 | 0.0<br>15<br>38<br>3 | 0.2<br>55<br>04      | Am<br>d2        | S-adenosylmethionine decarboxylase 2<br>[Source:MGI Symbol;Acc:MGI:1333111]               | protein_codin<br>g                       |
| ENSMUS<br>G000000<br>32968 | -<br>0.9<br>97<br>48 | 5.1<br>71<br>25<br>7 | 2.1<br>E-<br>05  | 0.0<br>18<br>48<br>9 | 0.5<br>00<br>87<br>3 | Inha            | inhibin alpha [Source:MGI<br>Symbol;Acc:MGI:96569]                                        | protein_codin<br>g                       |
| ENSMUS<br>G000000<br>99876 | 3.9<br>88<br>25<br>4 | -<br>0.8<br>11<br>57 | 2.2<br>2E-<br>05 | 0.0<br>18<br>48<br>9 | 15.<br>87<br>02<br>6 | Gm<br>296<br>50 | predicted gene 29650 [Source:MGI<br>Symbol;Acc:MGI:5580356]                               | lncRNA                                   |
| ENSMUS<br>G000001<br>00153 | -<br>3.2<br>17<br>08 | 2.4<br>53<br>65<br>4 | 2.2<br>5E-<br>05 | 0.0<br>18<br>48<br>9 | 0.1<br>07<br>53<br>8 | Ppp<br>1cc<br>b | protein phosphatase 1 catalytic subunit<br>gamma B [Source:MGI<br>Symbol;Acc:MGI:3647492] | transcribed_p<br>rocessed_pse<br>udogene |
| ENSMUS<br>G000000<br>26697 | -<br>1.5<br>56<br>23 | 2.1<br>32<br>79      | 3.9<br>9E-<br>05 | 0.0<br>31<br>66<br>3 | 0.3<br>40<br>03<br>7 | Myo<br>c        | myocilin [Source:MGI<br>Symbol;Acc:MGI:1202864]                                           | protein_codin<br>g                       |
| ENSMUS<br>G000001<br>02070 | 1.4<br>11<br>43<br>6 | 3.4<br>06<br>37<br>6 | 4.1<br>7E-<br>05 | 0.0<br>32<br>09<br>7 | 2.6<br>60<br>01<br>8 | Gm<br>286<br>61 | predicted gene 28661 [Source:MGI<br>Symbol;Acc:MGI:5579367]                               | unprocessed_<br>pseudogene               |
| ENSMUS<br>G000000<br>64370 | 0.9<br>54<br>80<br>5 | 13.<br>61<br>38<br>7 | 6.4<br>6E-<br>05 | 0.0<br>48<br>08<br>3 | 1.9<br>38<br>31<br>8 | mt-<br>Cytb     | mitochondrially encoded cytochrome b<br>[Source:MGI Symbol;Acc:MGI:102501]                | protein_codin<br>g                       |
| ENSMUS<br>G000000<br>43015 | -<br>1.2<br>65<br>1  | 2.9<br>95<br>00<br>4 | 6.8<br>8E-<br>05 | 0.0<br>49<br>66      | 0.4<br>16<br>07<br>2 | Ne<br>mp2       | nuclear envelope integral membrane protein<br>2 [Source:MGI Symbol;Acc:MGI:2444113]       | protein_codin<br>g                       |

**Table S6-ACC(contralateral)\_TNI-EA vs TNI**

| Gene_ID            | log FC   | log CPM  | PV alue  | FD R     | fc       | Gene. name     | Gene.description                                                                    | Gene.type              |
|--------------------|----------|----------|----------|----------|----------|----------------|-------------------------------------------------------------------------------------|------------------------|
| ENSMUSG00000075053 | 3.517774 | 2.693337 | 9.71E-16 | 2.31E-11 | 11.45396 | Vdac3-ps1      | voltage-dependent anion channel 3, pseudogene 1 [Source:MGI Symbol;Acc:MGI:1270159] | unprocessed_pseudogene |
| ENSMUSG00000049723 | -6.42535 | 1.383304 | 1.98E-11 | 1.73E-07 | 0.011635 | Mmp12          | matrix metalloproteinase 12 [Source:MGI Symbol;Acc:MGI:97005]                       | protein_coding         |
| ENSMUSG00000010768 | 5.399219 | 0.934213 | 2.17E-11 | 1.73E-07 | 42.20139 | Gm18541        | predicted gene, 18541 [Source:MGI Symbol;Acc:MGI:5010726]                           | processed_pseudogene   |
| ENSMUSG00000029816 | -3.48896 | 3.431578 | 8.07E-10 | 4.8E-06  | 0.089067 | Gpnm b         | glycoprotein (transmembrane) nmb [Source:MGI Symbol;Acc:MGI:1934765]                | protein_coding         |
| ENSMUSG00000091383 | -5.23533 | 0.328279 | 1.45E-09 | 6.91E-06 | 0.026547 | Hist1h2a1      | histone cluster 1, H2a1 [Source:MGI Symbol;Acc:MGI:3646032]                         | processed_pseudogene   |
| ENSMUSG00000032572 | 3.041412 | 2.185492 | 3.91E-09 | 1.55E-05 | 8.232962 | Col6a4         | collagen, type VI, alpha 4 [Source:MGI Symbol;Acc:MGI:1915803]                      | protein_coding         |
| ENSMUSG00000001119 | 1.566772 | 6.189249 | 1.14E-08 | 3.88E-05 | 2.962412 | Col6a1         | collagen, type VI, alpha 1 [Source:MGI Symbol;Acc:MGI:88459]                        | protein_coding         |
| ENSMUSG00000039617 | -4.25291 | 0.256833 | 2.06E-07 | 0.000614 | 0.05245  | Gm7488         | predicted gene 7488 [Source:MGI Symbol;Acc:MGI:3647006]                             | processed_pseudogene   |
| ENSMUSG00000013342 | 3.546467 | 0.410477 | 2.18E-06 | 0.005756 | 11.68404 | AA414992       | expressed sequence AA414992 [Source:MGI Symbol;Acc:MGI:2142939]                     | TEC                    |
| ENSMUSG00000040860 | 1.117116 | 5.652351 | 2.57E-06 | 0.006118 | 2.16913  | Crocc          | ciliary rootlet coiled-coil, rootletin [Source:MGI Symbol;Acc:MGI:3529431]          | protein_coding         |
| ENSMUSG00000029304 | -1.88285 | 2.7722   | 3.1E-06  | 0.006674 | 0.271148 | Spp1           | secreted phosphoprotein 1 [Source:MGI Symbol;Acc:MGI:98389]                         | protein_coding         |
| ENSMUSG00000084890 | 6.682904 | 2.613593 | 3.62E-06 | 0.006674 | 102.7436 | A830036E02 Rik | RIKEN cDNA A830036E02 gene [Source:MGI Symbol;Acc:MGI:3686876]                      | lncRNA                 |
| ENSMUSG00000002944 | -3.68687 | 0.932191 | 3.64E-06 | 0.006674 | 0.07765  | Cd36           | CD36 molecule [Source:MGI Symbol;Acc:MGI:107899]                                    | protein_coding         |

|                            |                      |                      |                  |                  |                  |             |                                                                                          |                                            |
|----------------------------|----------------------|----------------------|------------------|------------------|------------------|-------------|------------------------------------------------------------------------------------------|--------------------------------------------|
| ENSMUS<br>G000000<br>15340 | -<br>3.6<br>732<br>7 | 0.2<br>600<br>2      | 5.2<br>6E-<br>06 | 0.0<br>089<br>44 | 0.0<br>783<br>85 | Cybb        | cytochrome b-245, beta polypeptide<br>[Source:MGI Symbol;Acc:MGI:88574]                  | protein_coding                             |
| ENSMUS<br>G000001<br>00131 | -<br>2.1<br>157<br>3 | 2.2<br>687<br>35     | 6.2<br>5E-<br>06 | 0.0<br>099<br>19 | 0.2<br>307<br>29 | Gm28<br>439 | predicted gene 28439 [Source:MGI<br>Symbol;Acc:MGI:5579145]                              | unprocessed_ps<br>eudogene                 |
| ENSMUS<br>G000001<br>12693 | -<br>4.2<br>540<br>8 | -<br>0.1<br>249<br>7 | 9.1<br>8E-<br>06 | 0.0<br>136<br>57 | 0.0<br>524<br>07 | Gm55<br>12  | predicted gene 5512 [Source:MGI<br>Symbol;Acc:MGI:3645436]                               | transcribed_un<br>processed_pseu<br>dogene |
| ENSMUS<br>G000000<br>64357 | -<br>1.5<br>880<br>3 | 2.8<br>989<br>54     | 1.2<br>5E-<br>05 | 0.0<br>175<br>72 | 0.3<br>326<br>25 | mt-<br>Atp6 | mitochondrially encoded ATP<br>synthase 6 [Source:MGI<br>Symbol;Acc:MGI:99927]           | protein_coding                             |
| ENSMUS<br>G000000<br>74800 | -<br>5.2<br>214<br>1 | 5.1<br>319<br>34     | 1.4<br>1E-<br>05 | 0.0<br>186<br>2  | 0.0<br>268<br>04 | Gm41<br>49  | predicted pseudogene 4149<br>[Source:MGI<br>Symbol;Acc:MGI:3782325]                      | processed_pseu<br>dogene                   |
| ENSMUS<br>G000000<br>64354 | -<br>1.5<br>462<br>8 | 3.0<br>110<br>23     | 1.5<br>7E-<br>05 | 0.0<br>195<br>03 | 0.3<br>423<br>91 | mt-<br>Co2  | mitochondrially encoded cytochrome<br>c oxidase II [Source:MGI<br>Symbol;Acc:MGI:102503] | protein_coding                             |
| ENSMUS<br>G000001<br>00862 | -<br>1.2<br>492      | 4.0<br>507<br>75     | 1.6<br>4E-<br>05 | 0.0<br>195<br>03 | 0.4<br>206<br>8  | Gm10<br>925 | predicted gene 10925 [Source:MGI<br>Symbol;Acc:MGI:3809095]                              | unprocessed_ps<br>eudogene                 |
| ENSMUS<br>G000001<br>10126 | -<br>4.3<br>048<br>8 | -<br>0.4<br>440<br>6 | 1.8<br>E-<br>05  | 0.0<br>204<br>25 | 0.0<br>505<br>94 | Gm93<br>47  | predicted gene 9347 [Source:MGI<br>Symbol;Acc:MGI:3648409]                               | processed_pseu<br>dogene                   |
| ENSMUS<br>G000001<br>02070 | -<br>1.4<br>005<br>6 | 3.4<br>232           | 3.5<br>1E-<br>05 | 0.0<br>379<br>45 | 0.3<br>787<br>83 | Gm28<br>661 | predicted gene 28661 [Source:MGI<br>Symbol;Acc:MGI:5579367]                              | unprocessed_ps<br>eudogene                 |
